# Supplementary material
Source: PubMed Central journal article supplement (PMC4933598)
Supplement: supp_4.2.E185_2015-0001-original_submission.pdf [file supp_4.2.E185_2015-0001-original_submission.pdf]

1  
2  
3 The Canadian surgical wait list for lumbar degenerative spinal stenosis has a detrimental effect  
4  
5 on patient outcomes  
6  
7  
8  
9

10 Christopher S Bailey MD, MSc

11  
12 Kevin R Gurr, MD

13  
14 Stewart I Bailey, MD

15  
16 M. Patricia Rosas-Arellano, MD, PhD

17  
18 Corinne Tallon, BSc

19  
20 Jennifer C Urquhart, PhD  
21  
22  
23  
24  
25  
26  
27  
28  
29

30 Division of Orthopaedics, Department of Surgery, Schulich School of Medicine and Dentistry, The  
31  
32 University of Western Ontario, and London Health Sciences Center  
33  
34 800 Commissioners Road, London, Ontario, N6A 5W9, Canada.  
35  
36  
37  
38  
39

40 Corresponding Author:

41  
42 Dr. Christopher Bailey, London Health Sciences Center, E4-120, 800 Commissioners Road, East,  
43  
44 London, Ontario, N6A 4G5, Tel: 519-685-8500 x55358, Fax: 519-685-8059  
45

46  
47 email: Chris.Bailey@lhsc.on.ca  
48

49 Funding Statement: No funding was received specifically for this study. General institutional  
50  
51 funding support for research endeavours by the London Spine Centre is received from Medtronic  
52  
53 Canada, Stryker Canada, and Synthes Canada.  
54

55  
56 Declaration of competing interests: The authors have no competing interests to declare.  
57  
58  
59  
60

**Abstract**

**Background:** Waits for elective spine surgery are common in the Canadian health care system. We examined whether a prolonged wait for lumbar degenerative spinal stenosis surgery (LDSS) was detrimental to outcome.

**Methods:** We screened consecutive patients for eligibility upon referral to our centre between February 2006 and June 2010. Outcome measures including the SF-36-physical and mental component summary scores, Oswestry Disability Index, Zurich Claudication Questionnaire, back and leg pain numeric rating scale, and satisfaction were completed at referral, preoperatively, and until 24 months postoperatively. Wait time was defined as referral to surgery, and was categorized as prolonged if longer than the median wait.

**Results:** Of 1126 referrals, 166 patients met inclusion criteria. Two year follow-up was achieved by 85% of patients. The median wait time was 349 days. At referral, participants with short waits ( $\leq 12$  months) had poorer mental well-being ( $p = 0.001$ ), more disability ( $p = 0.040$ ), and worse leg pain ( $p = 0.026$ ). All HRQoL measures deteriorated during the waiting period. However, the magnitude of the deterioration was not affected by wait time. At 12 months following surgery a short wait saw greater improvement in mental well-being ( $p = 0.010$ ), disability ( $p = 0.002$ ), and leg pain ( $p = 0.019$ ). At 24 months there was no longer a statistical difference in outcome or satisfaction between those with short and long waits.

**Interpretation:** Participants awaiting surgery experienced deterioration in HRQoL irrespective of the length of waiting time. However, prolonged waits for LDSS had a greater detrimental effect.

## Introduction

Lumbar Degenerative Spinal Stenosis (LDSS) has a profound negative effect on an individual's function and quality of life. The preoperative health-related quality of life (HRQoL) measures are worse compared to those for other conditions such as congestive heart failure, COPD, cancer, or other frequently performed orthopaedic procedures [1-3]. LDSS is the leading indication for lumbar spinal surgery in patients over 65 years of age [1, 4] which is recognized to be superior to non-operative care [4-8]. The improvement in quality of life following surgery compares favorably to that achieved following total hip or knee arthroplasty - recognized as the gold standard and bench mark in orthopaedic surgery for achieving improvement in pain, function, and quality of life [3, 9, 10].

Unfortunately, in Canada, the wait time for spinal procedures continues to increase with a perceived detrimental effect on outcome and satisfaction [11]. Furthermore, with the aging demographic of Canadian society these wait times may only worsen with time. The effect these prolonged wait times have on a patient's HRQoL and postoperative outcome are unknown for LDSS. Our primary objective was to determine whether longer waits to LDSS surgery were associated with poorer preoperative and postoperative HRQoL. Secondly we aimed to determine the effect of wait time on patient's satisfaction with treatment.

## Methods

### *Study setting and population*

We conducted a prospective observational study on patients referred to three fellowship trained orthopaedic spine surgeons at the London Spine Centre, London Health Sciences Centre, for the treatment of LDSS. This study was approved by our institutional research ethics board. We screened consecutive referrals for eligibility between February 2006 and June 2010. Inclusion criteria included: neurogenic claudication or radiculopathy secondary to central or lateral recess stenosis between L1-S1

1 confirmed by CT or MRI, and patient consent for surgical treatment. Patients were excluded if the  
2  
3 stenosis was not degenerative (i.e. traumatic stenosis from a pathologic fracture), they had  
4  
5 inflammatory spine disease, severe or progressive neurologic deficit requiring urgent surgery, cancer,  
6  
7 previous lumbar surgery, an inability to complete the questionnaires or provide follow-up (i.e. lack of  
8  
9 permanent address, substance abuse, interfering psychiatric illness), or were pregnant.  
10  
11  
12  
13  
14

### 15 *Study Design*

16  
17 We screened referrals from the referring physician and to patients satisfying the inclusion criteria, we  
18  
19 mailed: a study information letter, outcome questionnaire, and the date of their initial consultation visit.  
20  
21 The initial consultation visit was assigned according to the date the referral was received, with no  
22  
23 formalized prioritization system. Patients returned the questionnaire by mail in a pre-paid, addressed  
24  
25 envelope. At the initial consult visit, the spine surgeon reassessed patients for eligibility anticipating  
26  
27 further exclusion by criteria that could not be assessed on the initial referral. We invited all eligible  
28  
29 patients to enter the study and written informed consent was obtained. A complete study rejection log  
30  
31  
32 was maintained. Patients waited for surgery on the individual operating surgeons wait list. The  
33  
34 surgeons had equal access to operating room time.  
35  
36  
37  
38  
39  
40

### 41 *Study Measures*

42  
43 We collected outcome measures at the initial referral (by mail), at initial consultation with the surgeon,  
44  
45 immediately prior to surgery (preoperative), and 6, 12, and 24 months postoperatively. Primary  
46  
47 outcome measures included the Medical Outcomes Study 36-Item Short Form Health Survey (SF-36)  
48  
49 physical (PCS) and mental (MCS) component summary scores, and the Oswestry Disability Index  
50  
51 (ODI). Secondary outcome measures included the symptom severity scale of the Zurich Claudication  
52  
53 Questionnaire (ZCQ), the numeric-rating scale for back and leg pain, and satisfaction.  
54  
55  
56  
57  
58  
59  
60

1 The SF-36 is a generic, multidimensional self-report health questionnaire and is validated when applied  
2 to the spine patient [12]. For the SF-36-PCS and MCS, higher scores imply better functioning. The ODI  
3 evaluates physical disability secondary to back and leg pain [13] and the ZCQ evaluates severity of  
4 spinal stenosis symptoms [14]. A higher score denotes worsening disability for both. The back and leg  
5 pain numeric rating scale range from 0 to 10, with lower scores indicating less severe symptoms [15].  
6  
7  
8  
9  
10  
11  
12  
13 Treatment satisfaction was also assessed.

### 14 15 16 17 *Statistical Analysis*

18  
19 For primary analysis the short versus long wait was set according to the median surgical wait time from  
20 referral to surgery. Chi-square tests and unpaired t-tests were used to compare wait times, participant  
21 characteristics, patient satisfaction, and outcome scores, and to compare participants with missing data  
22 to those that participated in all visits. An analysis of covariance was conducted to assess change in  
23 mean HRQoL scores from referral to preoperative assessment by wait time, adjusting for age, surgeon,  
24 duration of symptoms and type of surgery. Analysis of covariance was conducted to assess the  
25 difference in change in mean preoperative to postoperative assessment at 6, 12 and 24 months by wait  
26 time, adjusting for age, surgeon, duration of symptoms, type of surgery, and the baseline outcome value.  
27  
28  
29  
30  
31  
32  
33  
34  
35  
36  
37  
38  
39  
40  
41  
42  
43  
44  
45  
46  
47  
48  
49  
50  
51  
52  
53  
54  
55  
56  
57  
58  
59  
60  
P values <0.05 were considered to be statistically significant.

## 43 44 **Results**

### 45 46 *Population and baseline characteristics*

47  
48 One hundred and sixty-six patients were enrolled from the 1126 referrals initially considered during  
49 screening (Figure 1). The most frequent reasons for ineligibility were non-operative management  
50 (37.8 %) and improper spinal stenosis diagnosis/referral (24.0%).  
51  
52  
53  
54  
55  
56  
57  
58  
59  
60

1 The study population had a mean age of 66 years and mean BMI of 29 kg/m<sup>2</sup>, with the majority being  
2 retired, and having one or more comorbidity (Table 1). The majority had classic neurogenic  
3 claudication (50.6 %) as well as back pain symptoms (74.7 %). Overall, patients had experienced  
4 symptoms for a median duration of 24 months (range 6 to 210 months) at the time of initial  
5 consultation with the spine surgeon. Most participants had central and lateral recess stenosis (56.6%),  
6 stenosis at L4 - L5 (59.3 %), and spondylolisthesis (57.8 %). The majority of participants underwent  
7 decompression and instrumented fusion (81.9 %; Table 2). At 2 years, 9.6 % of patients required a  
8 second procedure; fewer than half were for recurrent symptoms (same or adjacent level stenosis).  
9  
10  
11  
12  
13  
14  
15  
16  
17  
18  
19  
20  
21

22 Patient follow-up was 85 % or higher for each visit. Characteristics of patients with missed visits were  
23 similar to the rest of the cohort except that they were more likely to be unemployed due to their back  
24 condition (4.5 % versus 16.7 %,  $p = 0.021$ ), and have less severe leg pain at referral ( $8.4 \pm 1.6$  versus  
25  $7.7 \pm 1.7$ ,  $p = 0.036$ ).  
26  
27  
28  
29  
30  
31  
32  
33

#### 34 *Wait times*

35  
36 In the overall cohort, the median time from referral to initial consultation was 177 days, and the time  
37 from consultation to surgery was 140 days (Table 3). The median wait time from referral to surgery was  
38 349 days (range, 65 to 946 days) and the mean wait time was  $361 \pm 173$  days. For analysis, we  
39 categorized wait time into short and long using the median wait of 12 months as the distinction.  
40  
41  
42  
43  
44  
45  
46  
47

#### 48 *Baseline and treatment characteristics compared between groups*

49  
50 The baseline characteristics of participants with short waits were not different from those with long  
51 waits (Table 1). Participants with a longer wait were more likely to undergo a multilevel fusion than  
52 those with shorter waits (30.6 % versus 14.9 %,  $p = 0.015$ ; Table 2). Participants stayed in hospital for a  
53 median of 4 days (range 1-18 days) after surgery with no difference between wait time groups ( $p =$   
54  
55  
56  
57  
58  
59  
60

1 0.562). Deep wound infection occurred in 2.2 % of surgeries among participants with short waits and  
2  
3 2.7 % of surgeries among those with long waits ( $p = 0.787$ ).  
4  
5  
6  
7

#### 8 *Effect of wait length on preoperative function*

9

10 At referral, participants with shorter waits had poorer SF-36-MCS scores, more spine specific  
11 disability, and worse leg pain than those with long waits ( $p$  values for SF-36-MCS = 0.001, ODI =  
12 0.040, leg pain = 0.026; Table 4). At the preoperative assessment the short wait cohort continued to  
13 have poorer mean scores on the SF-36-MCS ( $p=0.005$ ) and ODI scales ( $p = 0.002$ ), and tended to have  
14 greater leg pain ( $p = 0.007$ ) than those with a long wait.  
15  
16  
17  
18  
19  
20  
21

22 The mean change in outcome measures between baseline and preoperative assessments, adjusted for  
23 age, surgeon, duration of symptoms at consultation, and type of surgery, indicated some deterioration  
24 during the waiting period for all outcome measures assessed in both wait time cohorts (Table 5).  
25 However, comparisons between groups showed no evidence that the deterioration was affected by  
26 longer waits.  
27  
28  
29  
30  
31  
32  
33  
34  
35  
36  
37  
38

#### 39 *Effect of wait time on postoperative outcome*

40

41 Comparisons of the mean difference in change from preoperative score to 6 and 12 months after  
42 surgery revealed that those that had a short wait experienced greater gains in improvement by 4.5 (95%  
43 CI, 0.3 to 8.7) and 5.7 (95% CI, 1.4 to 9.9) on the MCS scale, -8.5 (95% CI, -14.7 to -2.4) and -9.3  
44 (95% CI, -15.1 to -3.6) on the ODI scale, and -1.4 (95% CI, -2.6 to -0.1) and -1.6 (95% CI, -3.0 to -0.3)  
45 on the intensity of leg pain index, respectively (Table 6). However by 24 months there was no longer a  
46 difference. We observed no significant differences in the mean change from preoperative score between  
47 short and long waits for SF-36-PCS, ZCQ, or back pain at 6, 12 or 24 months following surgery.  
48  
49  
50  
51  
52  
53  
54  
55  
56  
57  
58  
59  
60

### *Wait time and patient satisfaction with treatment*

There was no difference in satisfaction at the end of the preoperative waiting period between patients with short and long waits (6.8 % versus 12.5 %,  $p = 0.398$ , respectively). At 6 months following surgery the majority of patients were satisfied with the outcome of their surgical treatment (short, 89.4 % versus long, 84.7 %;  $p = 0.481$ ). At 12 months following surgery more patients in the short wait group were satisfied with their treatment (89.3 % versus 75.0 %,  $p = 0.010$ ). However, at 24 months following surgery a similar proportion of patients were satisfied in the short and long wait cohorts (80.9 % versus 75.0 %,  $p = 0.447$ , respectively).

### **Interpretation**

In this prospective, observational study we examined whether a prolonged wait from the time of referral to surgery for lumbar degenerative spinal stenosis patients was detrimental to outcome. We found deterioration in outcome measures during the waiting period occurred irrespective of the length of waiting time, and that patients with a shorter wait experienced greater improvements during the first year after surgery. These findings are of particular relevance to the Canadian publicly funded health care system, in which the median wait from referral to treatment by a neurosurgeon or orthopaedic surgeon is 26.6 and 39.6 weeks, respectively [16]. These waits are longer than the reported clinically reasonable wait, and likely under represent the actual wait as generally there are far fewer orthopaedic surgeons that have the subspecialized training necessary to practice spine surgery [16]. A survey of the Canadian Spine Society (completed by 86% of the membership) performed in 2005 judged the total wait of 24 weeks as an acceptable wait-time for elective spinal stenosis surgery [17]. The average wait time reported in our study fell well beyond this benchmark.

We did not confirm our hypothesis that length of wait time would correlate with a decline in function and quality of life during the waiting period. Possibly, because our patients were severely affected by



1 spinal stenosis in terms of their outcome measures, a “basement effect” prevented further distinction in  
2 their decline over time. Indeed, preoperative HRQoL was extremely poor when compared with mean  
3 age- and sex-matched Canadian population norms and were also worse than recently published cohorts  
4 of stenosis patients enrolled into other trials [4, 7, 18]. Other confounders include the heterogenous  
5 patient characteristics, and temporizing effects of non-operative treatment received during the wait.  
6 Interestingly, we identified poorer initial and preoperative mental health and function with greater leg  
7 pain scores among patients in the shorter wait time cohort. Although surgeons were blinded to the  
8 outcome scores, this finding is likely explained by surgeon selection bias whereby surgeons triaged  
9 patients for earlier surgery who were perceived to have greater disability and symptom severity. This  
10 speaks to the generalizability of our study as wait times are inherent to Canada’s publically funded  
11 medical system and therefore surgeons must prioritize their wait list for those with greatest need.  
12  
13  
14  
15  
16  
17  
18  
19  
20  
21  
22  
23  
24  
25  
26  
27  
28

29 Wait-time was found to have a profound effect on postoperative outcome. Despite a poorer  
30 preoperative score (which was controlled for in the post-operative analysis), patients with a shorter wait  
31 experienced greater improvements during the first year after surgery. Similarly, in 53 elective posterior  
32 lumbar surgery patients, Braybrook et al also reported that a longer wait was associated with less  
33 improvement in outcome following surgery [11]. In our study the greatest differences in improvement  
34 were in parameters relating to mental well-being (SF-36-CS), spine specific function (ODI) and leg  
35 pain. Although, we demonstrated significant improvement in both wait time groups, the delayed  
36 recovery of function and mental health demonstrated in the longer wait group likely reflects the  
37 advanced deconditioning that occurred secondary to prolonged immobility from spinal stenosis.  
38  
39  
40  
41  
42  
43  
44  
45  
46  
47  
48  
49

50 Interestingly, the magnitude of improvement in the SF-36-PCS did not differ between wait time groups  
51 despite the difference demonstrated for ODI. We believe this is likely due to two factors. Firstly, the  
52 comorbidities common to many patients suffering from spinal degenerative disease have a negative  
53 impact on the improvement in outcome scores following surgery particularly on a general measure of  
54  
55  
56  
57  
58  
59  
60

1 quality of life, such as the SF-36-PCS [19-21]. Secondly, that ODI and NRS leg pain measures are  
2  
3 recognized to be much more sensitive measures of response to spine surgery than is the SF-36-PCS  
4  
5 [22]. The similar magnitude of improvement seen in the ZCQ for both wait time groups is also not  
6  
7 surprising as neurogenic claudication is quickly eliminated by decompressive surgery.  
8  
9

10  
11  
12 The duration of spinal stenosis symptoms as preoperative predictors of postoperative outcome is  
13  
14 controversial [23]. Studies have found that symptom duration greater than one year is associated with a  
15  
16 poorer surgical outcome [24-26], while other authors have refuted this association [27, 28]. However,  
17  
18 many of these studies have been retrospective, sub-group post-hoc analysis, which relied on patient  
19  
20 recall to define the pre-operative symptom duration. In contrast, strengths of our study were a  
21  
22 prospective design, and inclusion of the entire spectrum of wait time commonly experienced in Canada;  
23  
24 from the time of referral to surgery.  
25  
26  
27  
28  
29

30  
31 A limitation is that we did not randomize our patients to a shorter or longer wait. Therefore, surgeon  
32  
33 bias, patient expectation, severity of the primary disease and secondary comorbidities were potential  
34  
35 cofounders to our design. We did attempt to control for some of these potential biases in our analysis  
36  
37 such as the difference between each surgeon's approach and surgical wait list, and the baseline outcome  
38  
39 scores at presentation.  
40  
41  
42  
43  
44

45  
46 In conclusion, patients awaiting LDSS surgery experienced deterioration in function and HRQoL  
47  
48 during the waiting period but the magnitude of the decline was not influenced by a shorter or longer  
49  
50 wait. However, prolonged waits were associated with a delay in recovery during the first year after  
51  
52 surgery. The wait times in our study reflect the reality faced by spinal surgeons and patients in Canada  
53  
54 today and we feel our findings are generalizable to the Canadian patient and health care system. Our  
55  
56 study suggests that strategies to reduce wait times to the clinically reasonable wait are urgently needed.  
57  
58  
59  
60

## References

1. Battie MC, Jones A, Schopflocher DP and Hu RW. Health-related quality of life and comorbidities associated with lumbar spinal stenosis. *Spine J* 2012;12:189-195.
2. Faneule JC, Birkmeyer NJO, Abdu WA et al. The impact of spinal problems on the health status of patient. Have we underestimated the effect? *Spine (Phila Pa 1976)* 2000;25(12):1509-1514.
3. Hansson T, Hansson E, and Malchau H. Utility of spine surgery. A comparison of common elective orthopaedic surgical procedures. *Spine (Phila Pa 1976)* 2008;33(25):2819-2830.
4. Weinstein JN, Tosteson TD, Lurie JD, et al. Surgical versus nonsurgical therapy for lumbar spinal stenosis. *N Engl J Med* 2008;358:794-810.
5. Weinstein JN, Tosteson TD, Lurie JD, et al. Surgical versus nonoperative treatment for lumbar spinal stenosis four-year results of the spine patient outcomes research trial (SPORT). *Spine (Phila Pa 1976)* 2010; 35(14):1329-1338.
6. Weinstein JN, Lurie JD, Tosteson TD et al. Surgical compared with nonoperative treatment for lumbar degenerative spondylolisthesis. *J Bone Joint Surg Am* 2009;91:1295-1304.
7. Malmivaara A, Slati P, Heliovaara M, et al. Surgical or nonoperative treatment for lumbar spinal stenosis? A randomized controlled trial. *Spine (Phila Pa 1976)* 2007;32(1):1-8.
8. Chang Y, Singer DE, Wu, YA, et al. The effect of surgical and nonsurgical treatment on longitudinal outcomes of lumbar spinal stenosis over 10 years. *J Am Geriatr Soc* 2005;53:785-792.
9. Rampersaud YR, Wai EK, Fisher CG, et al. Postoperative improvement in health-related quality of life: a national comparison of surgical treatment for focal (one- to two-level) lumbar spinal stenosis compared with total joint arthroplasty for osteoarthritis. *Spine J* 2011;11:1033-1041.

- 1  
2  
3  
4  
5  
6  
7  
8  
9  
10  
11  
12  
13  
14  
15  
16  
17  
18  
19  
20  
21  
22  
23  
24  
25  
26  
27  
28  
29  
30  
31  
32  
33  
34  
35  
36  
37  
38  
39  
40  
41  
42  
43  
44  
45  
46  
47  
48  
49  
50  
51  
52  
53  
54  
55  
56  
57  
58  
59  
60
10. Mokhtar SA, McCombe PF, Williamson OD, et al. Health-related quality of life: a comparison of outcomes after lumbar fusion for degenerative spondylolisthesis with large joint replacement surgery and population norms. *Spine J* 2010;10:306-312.
  11. Braybrooke J, Ahn H, Gallant A, et al. The impact of surgical wait time on patient-based outcomes in posterior lumbar spinal surgery. *Eur Spine J* 2007;16:1832-1839.
  12. Grevitt M, Khazim R, Webb J, et al. The short form-36 health survey questionnaire in spine surgery. *J Bone Joint Surg Br* 1997;79:48-52.
  13. Roland M, Fairbank J. The Roland-Morris Disability Questionnaire and the Oswestry Disability Questionnaire. *Spine (Phila Pa 1976)* 2000;25:3115-3124.
  14. Stucki G, Daltroy L, Liang MH, et al. Measurement properties of a self-administered outcome measure in lumbar spinal stenosis. *Spine (Phila Pa 1976)* 1996;21(7):796-803.
  15. Hudak PL, Wright JG. The characteristics of patient satisfaction measures. *Spine (Phila Pa 1976)* 2000;25:3167-3177.
  16. Barua B, Esmail N. Waiting Your Turn: Wait Times for Health Care in Canada, 2012 Report. Studies in Health Policy: Fraser Institute; 2012. Available: <http://www.fraserinstitute.org/research-news/display.aspx?id=19027> (accessed 2014 Aug. 28).
  17. A Clinical Perspective on Appropriate Wait-Times for Elective Spinal Surgery: Canadian Spine Society; Spinal Columns August 2006, Volume 6, No. 2. Available: <http://spinecanada.ca/newsletter-2006-volume-6-number-2/> (accessed 2014 Aug. 28).
  18. Hopman WM, Towheed T, Anastassiades T, et al. Canadian normative data for the SF-36 health survey. *Can Med Assoc J* 2000;163(3):265-71.
  19. Slover J, Abdu WA, Hanscom B, et al. The impact of comorbidities on the change in short-form 36 and Oswestry scores following lumbar spine surgery. *Spine (Phila Pa 1976)* 2006;31(17):1974-1980.

- 1  
2  
3  
4  
5  
6  
7  
8  
9  
10  
11  
12  
13  
14  
15  
16  
17  
18  
19  
20  
21  
22  
23  
24  
25  
26  
27  
28  
29  
30  
31  
32  
33  
34  
35  
36  
37  
38  
39  
40  
41  
42  
43  
44  
45  
46  
47  
48  
49  
50  
51  
52  
53  
54  
55  
56  
57  
58  
59  
60
20. Garratt AM, Klaber Moffett J, Farrin AJ. Responsiveness of generic and specific measures of health outcome in low back pain. *Spine (Phila Pa 1976)* 2001;26:71–7.
  21. Stucki G, Liang MH, Fossel AH, et al. Relative responsiveness of condition specific and generic health status measures in degenerative lumbar spinal stenosis. *J Clin Epidemiol* 1995;48:1369–78
  22. DeVine J, Norvell DC, Ecker E, et al. Evaluating the correlation and responsiveness of patient-reported pain with function and quality-of-life outcomes after spine surgery. *Spine (Phila Pa 1976)* 2011;36(21S):S69-74.
  23. Aalto TJ, Malmivaara A, Kovacs F, et al. Preoperative predictors for postoperative clinical outcome in lumbar spinal stenosis. *Spine (Phila Pa 1976)* 2006;31(18):E648-E663.
  24. Athviraham A, Wali ZA, and Yen, D. Predictive factors influencing clinical outcome with operative management of lumbar spinal stenosis. *Spine J* 2011;11:613-617.
  25. Radcliffe KE, Rihn J, Hilibrand A, et al. Does the duration of symptoms in patients with spinal stenosis and degenerative spondylolisthesis affect outcomes? Analysis of the spine outcomes research trial. *Spine (Phila Pa 1976)* 2011;36(25):2197-2210.
  26. Aalto T, Sinikallio S, Kroger H, et al. Preoperative predictors for good postoperative satisfaction and functional outcome in lumbar spinal stenosis surgery a prospective observational study with a two-year follow-up. *Scand J Surg* 2012;101:255-260.
  27. Amundsen T1, Weber H, Nordal HJ, et al. Lumbar spinal stenosis: conservative or surgical management?: A prospective 10-year study. *Spine (Phila Pa 1976)* 2000;25(11):1424-35.
  28. Spratt KF, Keller TS, Szpalski M. et al. A predictive model for outcome after conservative decompression surgery for lumbar spinal stenosis. *Eur Spine J* 2004;13:14-21.

1  
2  
3  
4  
5  
6  
7  
8  
9  
10  
11  
12  
13  
14  
15  
16  
17  
18  
19  
20  
21  
22  
23  
24  
25  
26  
27  
28  
29  
30  
31  
32  
33  
34  
35  
36  
37  
38  
39  
40  
41  
42  
43  
44  
45  
46  
47  
48  
49  
50  
51  
52  
53  
54  
55  
56  
57  
58  
59  
60

**Figure Legends**

**Figure 1.** Flow diagram of exclusion, enrollment, and follow-up.

Confidential

1  
2  
3  
4  
5  
6  
7  
8  
9  
10  
11  
12  
13  
14  
15  
16  
17  
18  
19  
20  
21  
22  
23  
24  
25  
26  
27  
28  
29  
30  
31  
32  
33  
34  
35  
36  
37  
38  
39  
40  
41  
42  
43  
44  
45  
46  
47  
48  
49  
50  
51  
52  
53  
54  
55  
56  
57  
58

1126 Referrals Selected following screening

136 canceled/no show to initial consult

Initial Consult  
990 Assessed for Eligibility

824 Excluded

*Did not meet inclusion criteria (582)*

- 312 Non-operative management
- 198 Symptoms not from spinal stenosis
- 49 No neurogenic claudication/radiculopathy
- 23 Foraminal stenosis only

*Met exclusion criteria (159)*

- 2 Pathologic fracture producing spinal stenosis
- 5 Acute traumatic fracture producing stenosis
- 1 Cauda Equina Syndrome
- 7 Progressive neurology requiring urgent surgery
- 13 Malignancy
- 53 Previous spinal surgery
- 41 Unable to complete outcome measures

  - 3 Substance abuse
  - 12 Psychiatric Illness
  - 22 Inflammatory arthropathy

*Other (83)*

- 83 Declined

166 Enrolled

Referral

- 148 Had data available
- 18 Missed visit
- 0 Lost to follow-up
- 0 Withdrew
- 0 Died

Initial Consult

- 164 Had data available
- 2 Missed visit
- 0 Lost to follow-up
- 0 Withdrew
- 0 Died

Pre-operative

- 156 Had data available
- 10 Missed visit
- 0 Lost to follow-up
- 0 Withdrew
- 0 Died

6 weeks Follow-up

- 154 Had data available
- 12 Missed visit
- 0 Lost to follow-up
- 0 Withdrew
- 0 Died

3 months Follow-up

- 160 Had data available
- 4 Missed visit
- 1 Lost to follow-up
- 1 Withdrew
- 0 Died

6 months Follow-up

- 156 Had data available
- 7 Missed visit
- 1 Lost to follow-up
- 1 Withdrew
- 1 Died

12 months Follow-up

- 153 Had data available
- 9 Missed visit
- 1 Lost to follow-up
- 1 Withdrew
- 2 Died

24 months Follow-up

- 144 Had data available
- 8 Missed visit
- 7 Lost to follow-up
- 1 Withdrew
- 6 Died

For Peer Review Only

Table 1: Subject demographic characteristics and comparison between short and long wait times

| Parameter                                                                                                | Total cohort<br>n=166 | Short<br>≤12<br>months<br>n=94 | Long<br>>12<br>months<br>n=72 | p value |
|----------------------------------------------------------------------------------------------------------|-----------------------|--------------------------------|-------------------------------|---------|
| Age, mean ± SD, years                                                                                    | 66.2 ± 9.0            | 66.1 ± 8.7                     | 66.3 ± 9.3                    | 0.854   |
| BMI, mean ± SD, kg/m <sup>2</sup>                                                                        | 29.0 ± 5.0            | 28.7 ± 4.5                     | 29.4 ± 5.6                    | 0.376   |
| Women, n (%)                                                                                             | 79 (47.6)             | 43 (45.7)                      | 36 (50.0)                     | 0.586   |
| Smoker Status, n (%)                                                                                     |                       |                                |                               | 0.674   |
| Never or no longer                                                                                       | 145 (87.3)            | 83 (88.3)                      | 62 (86.1)                     |         |
| Yes                                                                                                      | 21 (12.7)             | 11 (11.7)                      | 10 (13.9)                     |         |
| Employment Status, n (%)                                                                                 |                       |                                |                               | 0.525   |
| Not employed ( <i>related to back pain</i> )                                                             | 14 (8.4)              | 10 (10.6)                      | 4 (5.6)                       |         |
| Not employed ( <i>unrelated to back pain</i> )                                                           | 2 (1.2)               | 1 (1.1)                        | 1 (1.4)                       |         |
| Employed                                                                                                 | 39 (23.5)             | 18 (19.1)                      | 21 (29.2)                     |         |
| Retired                                                                                                  | 106 (63.9)            | 62 (66.0)                      | 44 (61.1)                     |         |
| Homemaker                                                                                                | 5 (3.0)               | 3 (3.2)                        | 2 (2.8)                       |         |
| †Comorbidities, n (%)                                                                                    |                       |                                |                               |         |
| None                                                                                                     | 33 (11.9)             | 21 (22.8)                      | 12 (16.2)                     | 0.364   |
| Hypertension                                                                                             | 87 (31.1)             | 44 (47.8)                      | 43 (58.1)                     | 0.099   |
| Diabetes                                                                                                 | 25 (8.9)              | 14 (15.2)                      | 11 (14.9)                     | 0.945   |
| Osteoporosis                                                                                             | 2 (0.7)               | 1 (1.1)                        | 1 (1.4)                       | 0.849   |
| Heart disorder                                                                                           | 27 (16.2)             | 15 (16.3)                      | 12 (16.2)                     | 0.902   |
| Stomach disorder                                                                                         | 21 (7.5)              | 13 (14.1)                      | 8 (10.8)                      | 0.602   |
| Bowel or intestinal                                                                                      | 2 (0.7)               | 1 (1.1)                        | 1 (1.4)                       | 0.849   |
| Depression                                                                                               | 7 (2.5)               | 5 (5.4)                        | 2 (2.7)                       | 0.419   |
| Joint disorder                                                                                           | 25 (7.9)              | 13 (14.1)                      | 12 (16.2)                     | 0.559   |
| Thyroid disorder                                                                                         | 15 (5.3)              | 9 (9.8)                        | 6 (8.1)                       | 0.782   |
| Other                                                                                                    | 31 (11.1)             | 15 (16.3)                      | 16 (21.6)                     | 0.305   |
| Unknown                                                                                                  | 9 (3.2)               | 5 (5.4)                        | 4 (5.4)                       | 0.947   |
| Neurological Diagnosis, n (%)                                                                            |                       |                                |                               | 0.633   |
| Claudication                                                                                             | 84 (50.6)             | 48 (51.1)                      | 36 (50.0)                     |         |
| Radiculopathy                                                                                            | 10 (6.0)              | 7 (7.4)                        | 3 (4.2)                       |         |
| Both                                                                                                     | 72 (43.4)             | 39 (41.5)                      | 33 (45.8)                     |         |
| Primary Complaint, n (%)                                                                                 |                       |                                |                               | 0.129   |
| Neurologic                                                                                               | 42 (25.3)             | 28 (29.8)                      | 14 (19.4)                     |         |
| Neurologic and mechanical back pain                                                                      | 124 (74.7)            | 66 (70.2)                      | 58 (80.5)                     |         |
| Duration of symptoms from time of onset to initial consultation with the surgeon, median (range), months | 24<br>(6 - 210)       | 24<br>(6 - 150)                | 30<br>(6 - 210)               | 0.166   |



|                                        |            |           |           |       |
|----------------------------------------|------------|-----------|-----------|-------|
| Location of Stenosis                   |            |           |           | 0.159 |
| Central and lateral recess             | 94 (56.6)  | 55 (58.5) | 39 (54.2) |       |
| Central, foraminal, and lateral recess | 38 (22.9)  | 16 (17.0) | 22 (30.6) |       |
| Lateral recess and foraminal           | 11 (6.6)   | 7 (7.4)   | 4 (5.6)   |       |
| Lateral recess                         | 23 (13.9)  | 16 (17.0) | 7 (9.7)   |       |
| †Level of stenosis, n (%)              |            |           |           |       |
| L2-3                                   | 15 (6.4)   | 5 (5.4)   | 10 (13.5) | 0.056 |
| L3-4                                   | 59 (25.0)  | 30 (31.9) | 29 (40.2) | 0.265 |
| L4-5                                   | 146 (59.3) | 81 (86.2) | 65 (90.3) | 0.420 |
| L5-S1                                  | 17 (10.2)  | 6 (6.4)   | 11 (14.9) | 0.061 |
| Number of levels, n (%)                |            |           |           | 0.499 |
| Single                                 | 113 (68.1) | 66 (70.2) | 47 (65.3) |       |
| Multiple                               | 53 (31.9)  | 28 (29.8) | 25 (34.7) |       |
| Spondylolisthesis, n (%)               | 96 (57.8)  | 55 (58.5) | 41 (56.9) | 0.840 |

†A patient could have more than one comorbidity or level of stenosis

BMI = body mass index

Table 2: Surgical treatment and peri-operative complications

| Parameter                                                       | Total cohort<br>n=166 | Short<br>≤12<br>months<br>n=94 | Long<br>>12<br>months<br>n=72 | <i>p</i> value |
|-----------------------------------------------------------------|-----------------------|--------------------------------|-------------------------------|----------------|
| Type of Surgery, n (%)                                          |                       |                                |                               | 0.138          |
| Decompression without Fusion                                    | 26 (15.7)             | 12 (12.8)                      | 14 (19.4)                     |                |
| Decompression and Fusion                                        |                       |                                |                               |                |
| Posterior instrumented fusion                                   | 49 (29.5)             | 25 (26.6)                      | 24 (33.3)                     |                |
| Posterior interbody fusion                                      | 87 (52.4)             | 53 (56.4)                      | 34 (47.2)                     |                |
| In-situ fusion                                                  | 4 (2.4)               | 4 (4.3)                        | 0 (0)                         |                |
| Multilevel fusion, n (%)                                        | 35 (21.1)             | 14 (14.9)                      | 22 (30.6)                     | 0.015          |
| Post-operative hospital length of stay,<br>median (Range), days | 4 (1-18)              | 4 (2-18)                       | 4 (1-17)                      | 0.562          |
| †Surgical complications, n (%)                                  |                       |                                |                               |                |
| Deep wound infection                                            | 4 (2.4)               | 2 (2.2)                        | 2 (2.7)                       | 0.787          |
| Wound dehiscence                                                | 2 (1.2)               | 2 (2.2)                        | 0 (0)                         | 0.506          |
| Dural Tear                                                      | 5 (3.0)               | 3 (3.3)                        | 2 (2.7)                       | 0.877          |
| Other                                                           | 11 (6.6)              | 5 (5.3)                        | 6 (8.1)                       | 0.439          |
| ‡Additional Surgery, n (%)                                      | 16 (9.6)              | 9 (9.6)                        | 7 (10.4)                      | 0.975          |
| 2 yr postsurgical reoperations, n (%)                           |                       |                                |                               |                |
| Irrigation & debridement                                        | 7 (4.2)               | 4 (4.3)                        | 3 (4.2)                       | 0.978          |
| Recurrent same level stenosis                                   | 4 (2.4)               | 2 (2.2)                        | 2 (2.1)                       | 0.787          |
| Adjacent level stenosis                                         | 2 (1.2)               | 2 (2.2)                        | 0 (0)                         | 0.506          |
| Other                                                           | 3 (1.8)               | 1 (1.1)                        | 2 (2.1)                       | 0.411          |
| Mortality at 2 year postoperative<br>follow-up visit, n (%)     | 6 (3.6)               | 5 (5.3)                        | 1 (1.4)                       | 0.184          |

† A patient could have more than one postsurgical complication

‡ Additional surgery is within the first 2 years after the index surgery

Table 3: Surgical wait time periods

| Time periods                                                                           | Mean $\pm$ SD (days) | Median (range, days) |
|----------------------------------------------------------------------------------------|----------------------|----------------------|
| Time from primary care physician referral to the initial consultation with the surgeon | 199 $\pm$ 132        | 177 (11 to 644)      |
| Time from the initial consultation with the surgeon to surgery                         | 162 $\pm$ 109        | 140 (16 to 645)      |
| Time from primary care physician referral to surgery                                   | 361 $\pm$ 173        | 349 (65 to 946)      |

Confidential

Table 4: Comparison of mean outcome scores at referral and immediately preoperative among patients with short ( $\leq 12$  months) and long ( $>12$  months) waits for surgery

| Outcome Measure | Mean score (and SD) at referral |                   |                | Mean score (and SD) immediately preoperative |                   |                |
|-----------------|---------------------------------|-------------------|----------------|----------------------------------------------|-------------------|----------------|
|                 | Short $\leq 12$ months          | Long $>12$ months | <i>p</i> value | Short $\leq 12$ months                       | Long $>12$ months | <i>p</i> value |
| SF-36 PCS       | 25.2 (4.9)                      | 24.8 (5.8)        | 0.656          | 25.3 (5.1)                                   | 24.7 (6.5)        | 0.571          |
| SF-36 MCS       | 42.3 (12.2)                     | 49.1 (11.6)       | 0.001          | 41.3 (12.2)                                  | 46.7 (11.4)       | 0.005          |
| ODI             | 46.8 (14.1)                     | 42.1 (13.2)       | 0.040          | 53.0 (14.1)                                  | 46.2 (12.2)       | 0.002          |
| ZCQ             | 3.7 (0.5)                       | 3.6 (0.6)         | 0.238          | 3.8 (0.6)                                    | 3.6 (0.6)         | 0.056          |
| Back pain       | 7.0 (2.4)                       | 6.6 (2.2)         | 0.281          | 7.6 (2.3)                                    | 6.9 (2.4)         | 0.081          |
| Leg pain        | 8.5 (1.3)                       | 7.8 (2.0)         | 0.026          | 8.6 (1.4)                                    | 7.8 (2.4)         | 0.007          |

Abbreviations: SF-36, Medical Outcomes Study 36-Item Short Form Health Survey; PCS, physical component score; MCS mental component score; ODI, Oswestry Disability Index; ZCQ, symptom severity of the Zurich Claudication Questionnaire.

Mean summary scores are based on normative data and have a mean  $\pm$  50.

The ODI ranges from 1 to 100 and ZCQ ranges from 1 to 5, with lower scores indicating less severe symptoms

Average back pain and average leg pain range from 0 to 10, with lower scores indicating less severe symptoms

Table 5: Adjusted mean changes in outcome from referral until immediately preoperative among patients with short ( $\leq 12$  months) and long ( $>12$  months) waits for surgery

| Outcome Measure      | Mean change in score $\leq 12$ months | Mean change in score $>12$ months | Mean Difference in Change (95% CI) | <i>p</i> value |
|----------------------|---------------------------------------|-----------------------------------|------------------------------------|----------------|
| SF-36 PCS, mean (SE) | -0.8 (0.9)                            | -1.3 (0.9)                        | 0.5 (-1.5, 2.6)                    | 0.601          |
| SF-36 MCS, mean (SE) | -0.9 (1.5)                            | -1.6 (1.6)                        | 0.6 (-2.8, 4.1)                    | 0.715          |
| ODI, mean (SE)       | 6.6 (1.5)                             | 3.9 (1.6)                         | 2.7 (-0.9, 6.2)                    | 0.141          |
| ZCQ, mean (SE)       | 0.2 (0.1)                             | 0.2 (0.1)                         | 0.01 (-0.2, 0.2)                   | 0.880          |
| Back pain, mean (SE) | 0.7 (0.5)                             | 0.6 (0.6)                         | 0.1 (-1.0, 1.2)                    | 0.840          |
| Leg pain, mean (SE)  | 0.4 (0.3)                             | 0.2 (0.4)                         | 0.3 (-0.4, 1.0)                    | 0.420          |

Values are adjusted for age, surgeon, duration of symptoms at consultation, and surgery type.

Abbreviations: SF-36, Medical Outcomes Study 36-Item Short Form Health Survey; PCS, physical component score; MCS mental component score; ODI, Oswestry Disability Index; ZCQ, symptom severity of the Zurich Claudication Questionnaire.

For SF-36 PCS and MCS a negative change score indicates deterioration. For ODI, ZCQ, Back pain and Leg pain a positive change score indicates deterioration.

Table 6: Changes in outcome from immediately preoperative assessment until 6, 12 and 24 months postoperative among patients with short ( $\leq 12$  months) and long ( $>12$  months) waits for surgery

| 6 months        |                        |                   |                                    |                |
|-----------------|------------------------|-------------------|------------------------------------|----------------|
| Outcome Measure | Short $\leq 12$ months | Long $>12$ months | Mean Difference in Change (95% CI) | <i>p</i> value |
| SF-36 PCS       | 12.3 (1.6)             | 10.1 (1.7)        | 2.2 (-1.6, 6.0)                    | 0.252          |
| SF-36 MCS       | 11.1 (1.8)             | 6.6 (1.8)         | 4.5 (0.3, 8.7)                     | 0.035          |
| ODI             | -26.8 (2.7)            | -18.2 (2.7)       | -8.5 (-14.7, -2.4)                 | 0.007          |
| ZCQ             | -1.6 (0.2)             | -1.3 (0.2)        | -0.3 (-0.6, 0.05)                  | 0.094          |
| Back pain       | -5.0 (0.6)             | -4.7 (0.6)        | -0.4 (-1.6, 0.8)                   | 0.557          |
| Leg pain        | -6.2 (0.6)             | -4.9 (0.6)        | -1.4 (-2.6, -0.1)                  | 0.029          |
| 12 months       |                        |                   |                                    |                |
| Outcome Measure | Short $\leq 12$ months | Long $>12$ months | Mean Difference in Change (95% CI) | <i>p</i> value |
| SF-36 PCS       | 12.5 (1.6)             | 12.0 (1.8)        | 0.6 (-3.3, 4.5)                    | 0.774          |
| SF-36 MCS       | 11.1 (1.8)             | 5.6 (1.9)         | 5.7 (1.4, 9.9)                     | 0.010          |
| ODI             | -30.2 (2.5)            | -20.8 (2.5)       | -9.3 (-15.1, -3.6)                 | 0.002          |
| ZCQ             | -1.6 (0.2)             | -1.5 (0.2)        | -0.2 (-0.5, 0.2)                   | 0.329          |
| Back pain       | -4.9 (0.6)             | -4.3 (0.7)        | -0.5 (-1.9, 0.7)                   | 0.417          |
| Leg pain        | -6.8 (0.6)             | -5.2 (0.7)        | -1.6 (-3.0, -0.3)                  | 0.019          |
| 24 months       |                        |                   |                                    |                |
| Outcome Measure | Short $\leq 12$ months | Long $>12$ months | Mean Difference in Change (95% CI) | <i>p</i> value |
| SF-36 PCS       | 10.6 (1.7)             | 11.2 (1.9)        | -0.7 (-4.8, 3.3)                   | 0.729          |
| SF-36 MCS       | 9.6 (1.8)              | 5.9 (1.9)         | 3.7 (-0.6, 8.0)                    | 0.089          |
| ODI             | -27.1 (2.4)            | -22.2 (2.6)       | -4.9 (-10.6, 0.9)                  | 0.098          |
| ZCQ             | -1.4 (0.2)             | -1.2 (0.2)        | -0.2 (-0.6, 0.1)                   | 0.213          |
| Back pain       | -5.1 (0.7)             | -4.5 (0.7)        | -0.6 (-1.9, 0.8)                   | 0.429          |
| Leg pain        | -6.1 (0.6)             | -4.9 (0.6)        | -1.1 (-2.3, 0.1)                   | 0.082          |

Values are adjusted for baseline score, age, surgeon, duration of symptoms, and surgery type. Abbreviations: SF-36, Medical Outcomes Study 36-Item Short Form Health Survey; PCS, physical component score; MCS mental component score; ODI, Oswestry Disability Index; ZCQ, symptom severity of the Zurich Claudication Questionnaire. For SF-36 PCS and MCS a positive change score indicates improvement. For ODI, ZCQ, Back pain and Leg pain a negative change score indicates improvement.
